# Supplementary material for: Photonic crystal enhancement of Raman scattering
Source: Royal Society of Chemistry journal article supplement (doi:10.1039/d0cp00781a), 2020-01-01
Supplement: d0cp00781a1.pdf [file d0cp00781a1.pdf]

## Supplementary Information

### Photonic crystal enhancement of Raman scattering

Matin Ashurov,<sup>a</sup> Alexander Baranchikov,<sup>bc</sup> and Sergey Klimonsky<sup>ac\*</sup>

*<sup>a</sup>Faculty of Materials Science, Lomonosov Moscow State University, Moscow, 119991 Russia*

*<sup>b</sup>Kurnakov Institute of General and Inorganic Chemistry, Russian Academy of Sciences, Moscow, 119991 Russia*

*<sup>c</sup>Department of Chemistry, Lomonosov Moscow State University, Moscow, 119991 Russia*

E-mail address:

\* Sergey Klimonsky, email: [klim@inorg.chem.msu.ru](mailto:klim@inorg.chem.msu.ru)

## S1. Reflectance spectra for opaline PhC films based on monodisperse SiO<sub>2</sub> microspheres

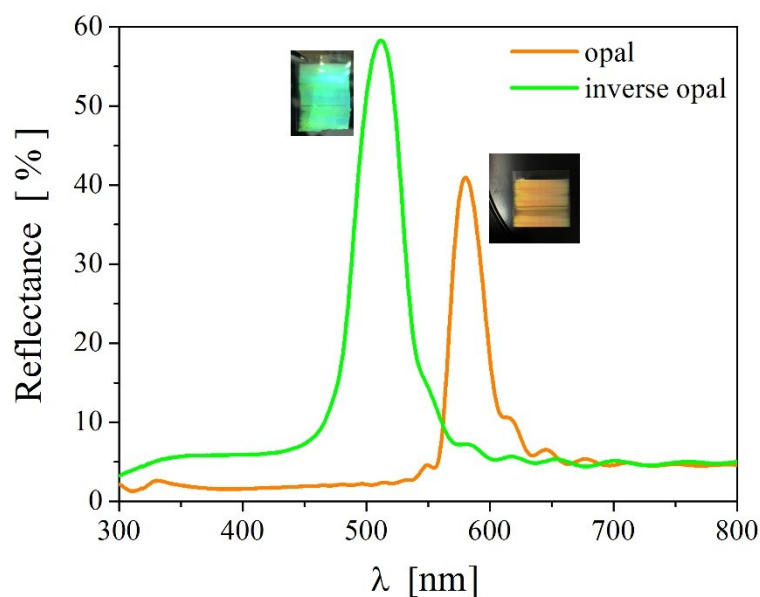

**Figure S1.** Reflectance spectra for an opal film composed of  $D = 255$  nm microspheres and the inverse opal PhC film derived from it (sample F4 in Table 1 of the article).

Inverse films demonstrate higher and wider reflectance peaks associated with the stop band.

## S2. Subtracting the luminescence background

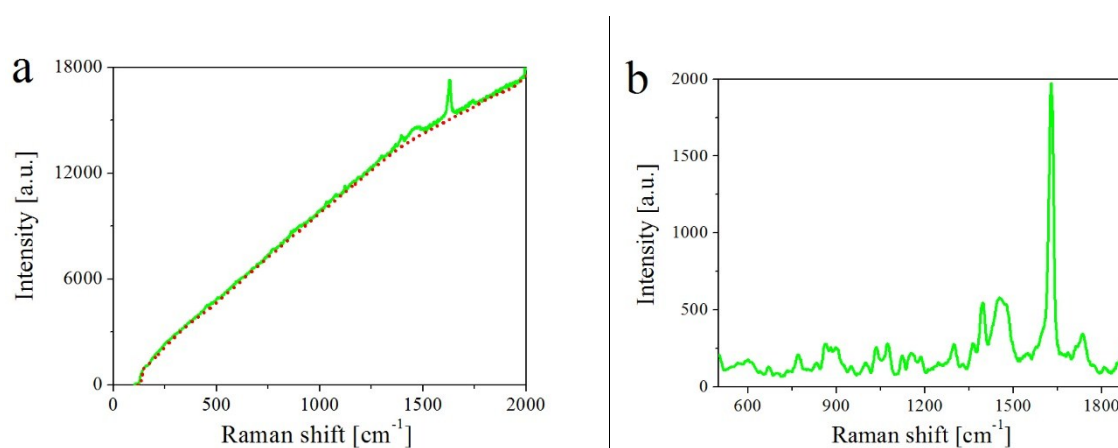

**Figure S2.** (a) The Raman spectrum recorded for sample F4 (green solid line) and the approximation of the background of its luminescence (red dotted line). (b) The same Raman spectrum after subtracting the luminescence background.

### S3. Raman peaks for ETPTA and MB

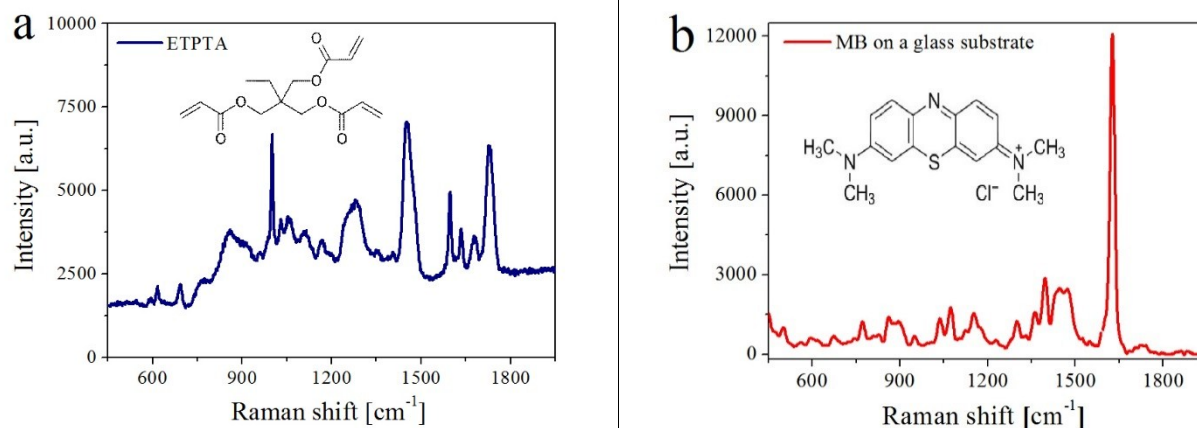

**Figure S3.** (a) Raman peaks for pure ETPTA film without dye and (b) for MB on a glass substrate. These spectra are in good agreement with the reference data (Ref. (1); see also Refs.<sup>30, 31</sup> from the main text).

**Table S1.** Raman peak frequencies corresponding to Fig. S3 (a, b) and their assignment from Ref. (1).

| Molecules | Raman shift (cm <sup>-1</sup> ) | Band assignment                          |
|-----------|---------------------------------|------------------------------------------|
| ETPTA     | 998                             | out-of-plane bending -CH=CH <sub>2</sub> |
|           | 1278                            | asymmetric stretching of C-O             |
|           | 1452                            | sym. def. vib. of =CH <sub>2</sub>       |
|           | 1635                            | C=C stretching, polarized                |
|           | 1681                            | C=C stretching, strong                   |
|           | 1729                            | stretching of the -C=O                   |
| MB dye    | 502                             | skeletal deformation of C-N-C            |
|           | 596                             | skeletal deformation of C-S-C            |
|           | 671                             | out-of-plane bending of C-H              |
|           | 770                             | N-CH <sub>3</sub> stretching             |
|           | 1040                            | C-H in-plane bending                     |
|           | 1186                            | asymmetric stretching of C-N             |
|           | 1302                            | in plane ring deformation of C-H         |
|           | 1398                            | asymmetric C-N stretching                |
|           | 1505                            | asymmetric stretching of C-C ring        |
|           | 1629                            | stretching of the C-C ring               |

#### Reference

(1) Socrates, G. *Infrared and Raman Characteristic Group Frequencies: Tables and charts*. 3-rd ed. Middlesex. UK, 2001.
